# Supplementary material for: Classical oxidant induced chemiluminescence of fluorescent carbon dots
Source: Royal Society of Chemistry journal article supplement (doi:10.1039/c1cc15290d), 2011-12-08
Supplement: c1cc15290d.pdf [file c1cc15290d.pdf]

## Electronic Supporting Information

### Classical Oxidant Induced Chemiluminescence of Fluorescent Carbon Dots

Zhen Lin, Wei Xue, Hui Chen, Jin-Ming Lin\*

Beijing Key Laboratory of Analytical Methods and Instrumentation, Department of Chemistry, Tsinghua University, Beijing, 100084, P. R. China.

To whom correspondence should be addressed. Jin-Ming Lin, Phone: +86 10 6279-2343. Fax: +86 10 6279-2343. E-mail: jmlin@mail.tsinghua.edu.cn

## Supporting Information

### 1. The preparation of carbon dots

1g PEG 1500 and 15 mL glycerine were pretreated with microwave to form clean and homogeneous solution. 1g serine was injected following. The mixture was further treated by microwave oven for 10 min. The color of the solution changed to brown. And the solution exhibited strong fluorescence under UV irradiation. The as-prepared carbon dots were purified by dialysis (The cut-off of the dialysis membrane equivalent to Mw ~ 2000). The carbon dots solution was then concentrated by rotary evaporator to 10 mL and diluted with water before their using in the CL experiment.

It should be pointed out that microwave treatment of PEG 1500 and glycerine in the absence of serine brought out rather weak and irregular fluorescence emission. The pure glycerine solution after treatment remained clear and very weak photoluminescence was observed. Hence, the bright photoluminescence should be attributed to the formed carbon dots.

## 2. Instruments and characterization

The CL kinetic curves were recorded by a BPCL luminescence analyzer (Institute of Biophysics, Chinese Academy of Sciences, Beijing, China). The flow injection CL signal was measured with a LumiFlow LF 800 detector (NITI ON, Funabashi, Japan). Transmission electron microscopy image was recorded by a JEM 2010 electron microscope (JEOL, Japan). UV-vis absorption was characterized by a UV-vis spectrophotometer (UV 3900, Hitachi, Japan). The fluorescence spectrum and CL spectrum were measured with a fluorescence spectrophotometer (F7000, Hitachi, Japan). Electron paramagnetic resonance (EPR) spectra were measured on a Model JES-FA200 spectrometer (JEOL, Tokyo, Japan). Fourier transform infrared (FTIR) spectrum was recorded on a PerkinElmer 100 FTIR spectrometer (Massachusetts, USA). The X-ray photoelectron spectrum (XPS) was measured by a PHI Quantera SXM<sup>TM</sup> Scanning X-ray Microprobe<sup>TM</sup> using Al-K $\alpha$  as the exciting source (1486.6eV) and binding energy calibration was based on C 1s at 284.8 eV.

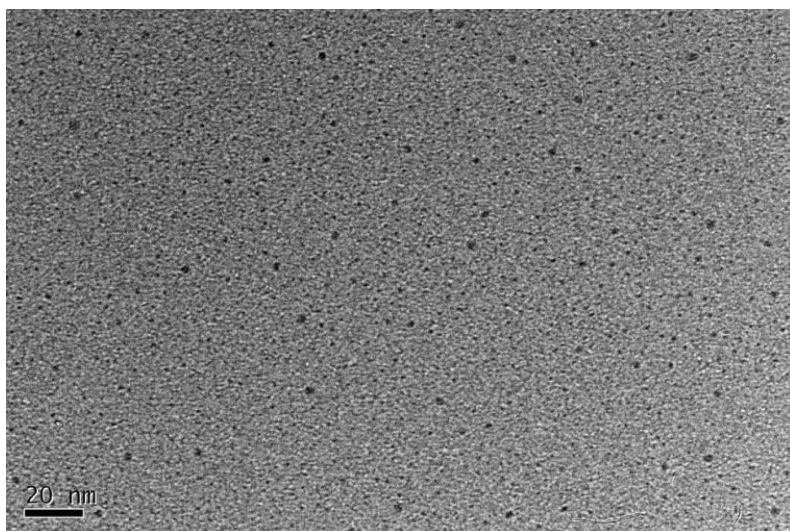

**Figure S1.** TEM image of the carbon dots

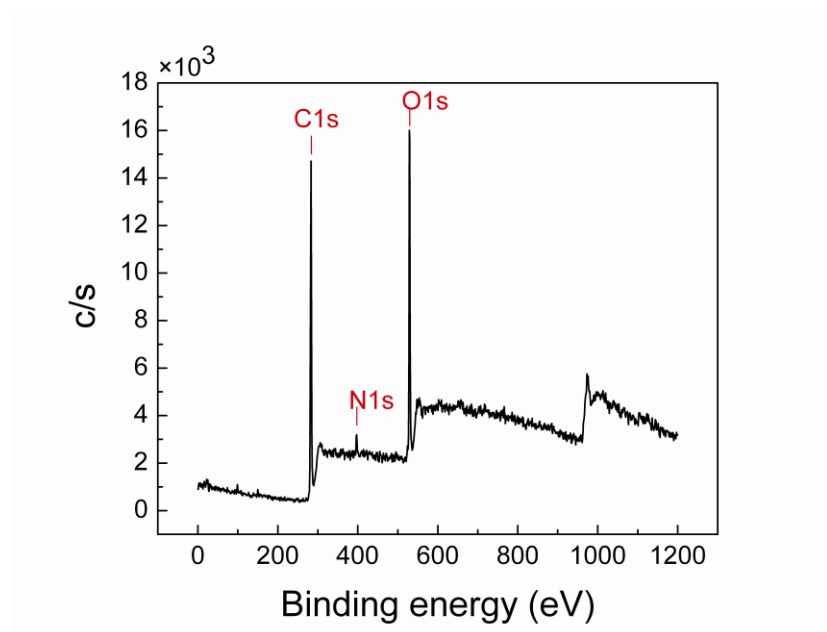

**Figure S2.** X-ray photoelectron spectrum of carbon dots.

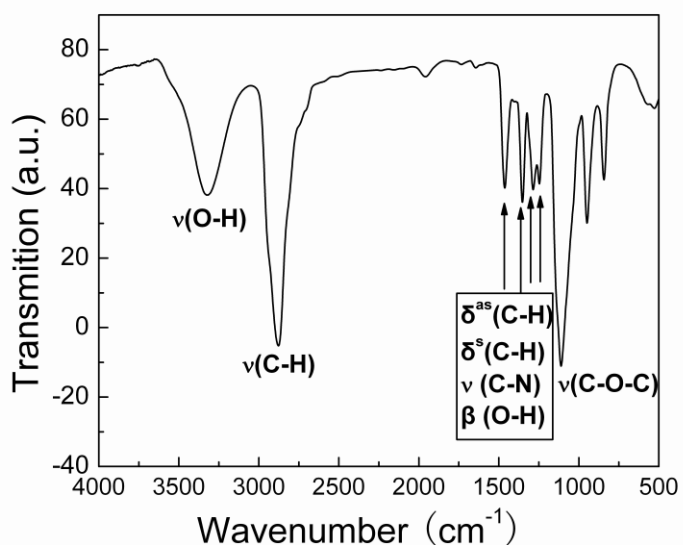

**Figure S3.** The IR spectrum for the carbon dots prepared from serine.

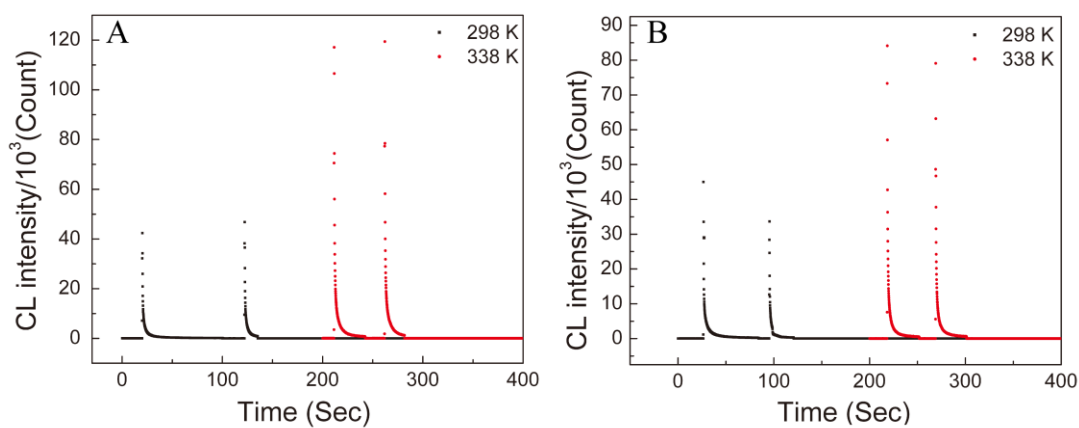

**Figure S4.** The CL kinetic curve of carbon dots-KMnO<sub>4</sub> system (A) and carbon dots-cerium(IV) system (B) at 298 K and 338 K, respectively. The concentration of KMnO<sub>4</sub> and cerium(IV) is  $2 \times 10^{-3}$  M and  $1 \times 10^{-3}$  M. 0.05 M H<sub>2</sub>SO<sub>4</sub> was the CL reaction media. Carbon dots were in a dilution of 1:20. The peaks were carried out in

duplicate.

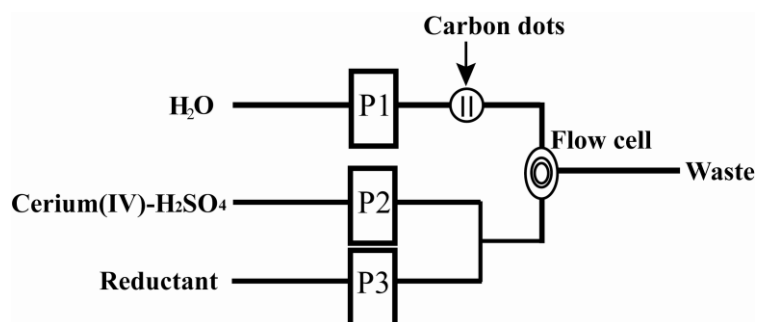

**Figure S5.** The flow injection manifolds of the carbon dots-cerium(IV) system. P1, P2 and P3 stand for three peristaltic pumps using for solution delivery.

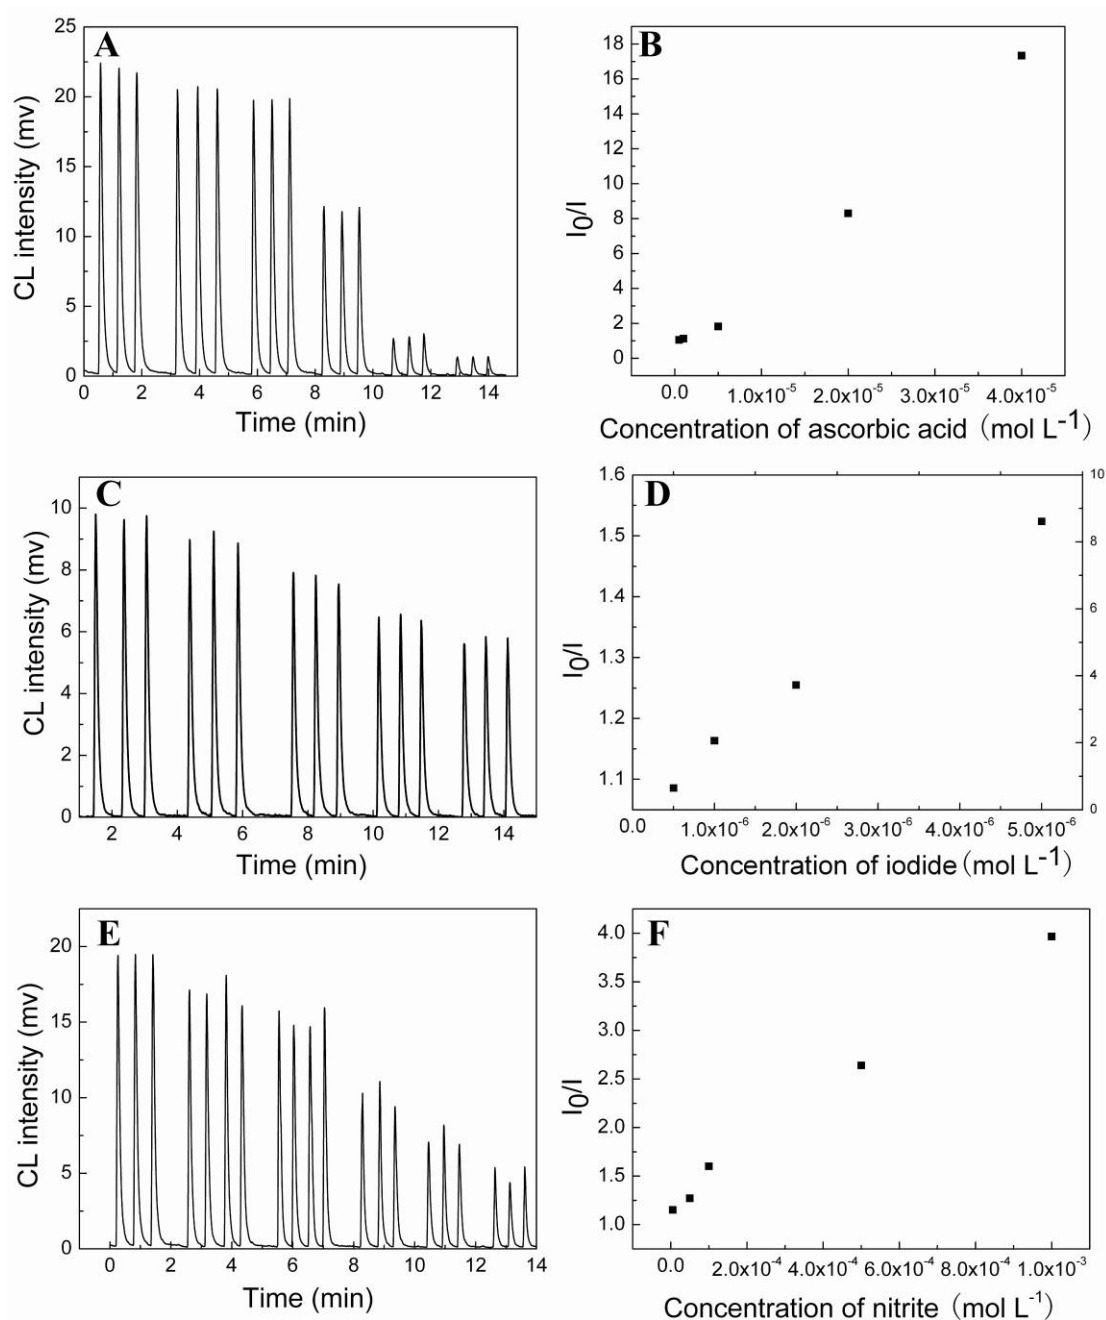

**Figure S6.** The flow injection signals and standard curves of the carbon dots-cerium (IV) system in the present of ascorbic acid (A and B), iodide (C and D), nitrite (E and F).

The ratio of the initial CL intensity  $I_0$  of carbon dots-cerium (IV) system to the CL intensity  $I$  at a given concentration of reductant,  $I_0/I$ , was proportional to the

concentration of reductant. The dependence of  $I_0/I$  on the concentration of reductant

was coincident to the Stern-Volmer equation ( $I_0/I = 1 + K_{sv}[Q]$ ).

For ascorbic acid,  $I_0/I = 4.17 \times 10^5 [\text{ascorbic acid}] + 0.38$        $R = 0.9975$

For iodide ion,  $I_0/I = 1.01 \times 10^5 [\text{iodide ion}] + 1.056$        $R = 0.9972$

For nitrite,  $I_0/I = 2.79 \times 10^3 [\text{nitrite}] + 1.20$        $R = 0.9977$
